# Supplementary material for: Flexoelectric MEMS: towards an electromechanical strain diode
Source: Royal Society of Chemistry journal article supplement (doi:10.1039/c5nr06514c), 2015-12-02
Supplement: c5nr06514c1.pdf [file c5nr06514c1.pdf]

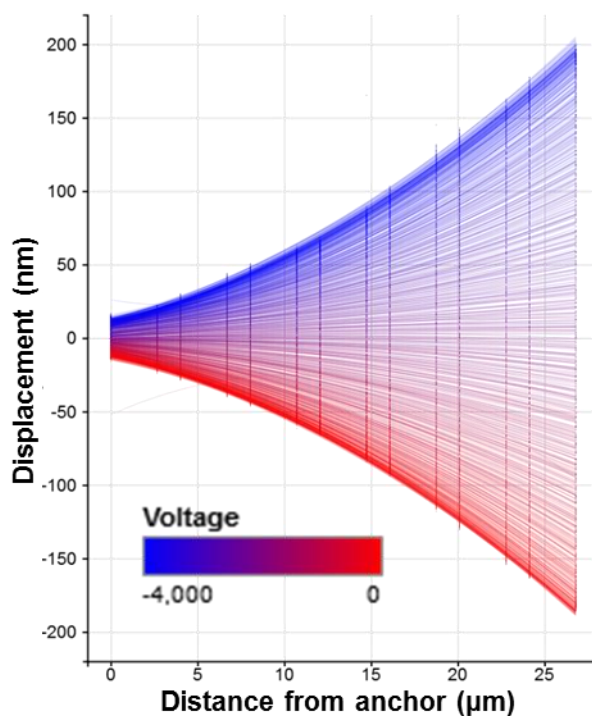

**Figure S1** The out of plane displacement measured on a number of locations close to the anchor is plotted as points, and the quadratic regression fit used to extract the curvature is superimposed as a line segment connecting the points.

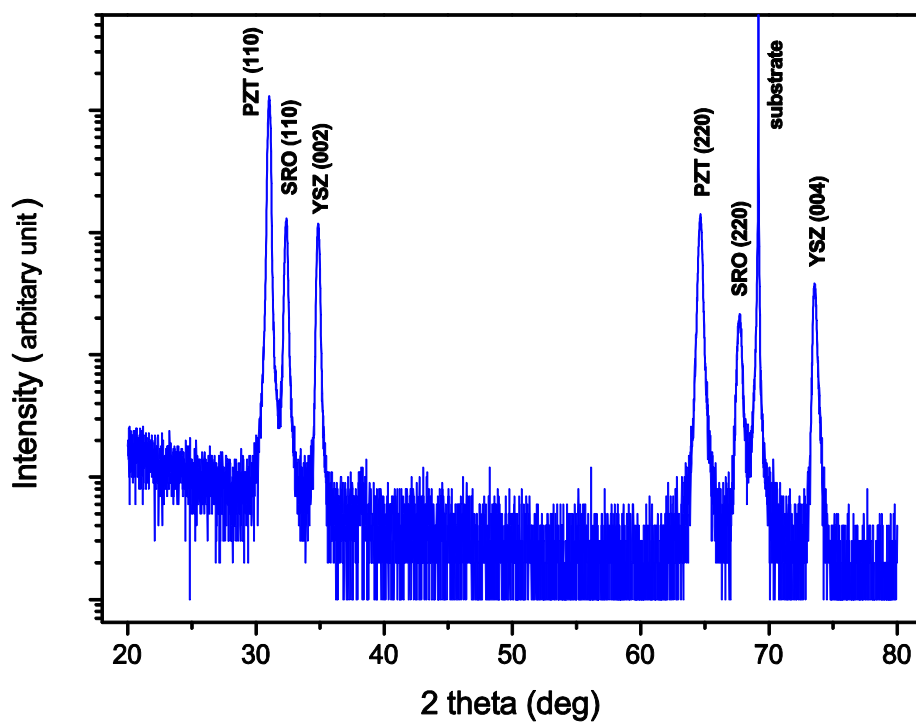

**Figure S2** X-Ray diffraction pattern of the perovskite heterostructures.

**Supplementary Table 1.** Peak positions and calculated atomic spacing of the (011) planes.

| <b>Thickness of film<br/>(nm)</b> | <b>Position of 2 theta PZT<br/>(110) (deg)</b> | <b>Position of 2 theta PZT<br/>(220) (deg)</b> | <b><math>d_{(011)}</math><br/>(nm)</b> |
|-----------------------------------|------------------------------------------------|------------------------------------------------|----------------------------------------|
| 75                                | 30.995                                         | 64.752                                         | 0.2886                                 |
| 100                               | 31.055                                         | 64.5368                                        | 0.2877                                 |
| 150                               | 31.065                                         | 64.32                                          | 0.2876                                 |
